# Supplementary material
Source: ML conference proceedings conference paper supplement (https://openaccess.thecvf.com/content/ICCV2021/html/Zhu_Semantic-Embedded_Unsupervised_Spectral_ICCV_2021_paper.html)
Supplement: Supplementary file 1 [file Zhu_Semantic-Embedded_Unsupervised_Spectral_ICCV_2021_supplemental.zip]

Archive with 2 entries (2 files):
- 02456-supp.mp4
- 02456-supp.pdf
